# Supplementary material for: Surface reconstruction and enhanced catalytic performance of MAX phase V 2 AlC for oxidative dehydrogenation of propane
Source: Royal Society of Chemistry journal article supplement (doi:10.1039/d4nj05246c), 2025-01-01
Supplement: d4nj05246c1.pdf [file d4nj05246c1.pdf]

# Supporting Information

## 1. Materials

The synthesis of  $V_2AlC$  was carried out through a series of methodical steps. Initially, powders were combined in an equimolar ratio, consisting of vanadium powder (particle size 10-20  $\mu\text{m}$ , 99.0 wt% purity, sourced from Shanghai Pantian Powder Material Co., Ltd., Shanghai, China), aluminium powder (particle size 10-20  $\mu\text{m}$ , 99.0 wt% purity, obtained from Sinopharm Chemical Reagent Co., Ltd., Shanghai, China), vanadium carbide powder (particle size 10  $\mu\text{m}$ , 99.0 wt% purity, also from Shanghai Pantian Powder Material Co., Ltd.), sodium chloride powder (particle size 1  $\mu\text{m}$ , 99.7 wt% purity, supplied by Aladdin Industrial Co., Ltd., Shanghai, China), and potassium chloride powder (particle size 1  $\mu\text{m}$ , 99.7 wt% purity, from Aladdin Industrial Co., Ltd.). The mixed powders were then ground for 10 minutes. Subsequently, the mixture was placed into an alumina crucible and heated in a furnace at 1100 °C for 7 hours, with a heating rate of 5 °C /min under an argon atmosphere. After heating, the product was washed with 1 M hydrochloric acid (36.0–38.0 wt%, Sinopharm Chemical Reagent Co., Ltd.), filtered using filter paper, and dried in a vacuum at 40 °C. This procedure successfully yielded the MAX phase  $V_2AlC$ . Additionally, MgO doping into the MAX phase  $V_2AlC$  was achieved by mixing the two powders with a mortar and pestle.

## 2. Characterizations

The characterization of the catalysts was carried out using several advanced techniques to ensure comprehensive analysis. Powder X-ray diffraction data were acquired through a Bruker AXS D8 Advance Powder X-ray Diffraction system, utilizing  $\text{Cu K}\alpha$  radiation. Data collection was executed with a step size of  $0.02^\circ(2\theta)$  and a collection duration of 1 second per step. Microstructural and chemical composition analyses were performed using a QUANTA 250 FEG

scanning electron microscope (SEM) equipped with an Energy-Dispersive Spectrometer (EDS). The compositional values were calibrated employing the extended Puchou/Pichoir (XPP) method. The surface composition and valency state of  $V_2AlC$  were investigated using X-ray Photoelectron Spectroscopy (XPS) with a Thermo Scientific Escalab 250Xi instrument, which utilized Al  $K\alpha$  radiation. Binding energy (BE) peaks for all elements were calibrated against the C 1s peak at 284.8 eV. Finally, molecular functional groups present in the samples were identified using a LabRamHR Evolution spectrometer from Jobin-Yvon Horiba Scientific.  $H_2$ -TPR was measured using Micromeritics AutoChem II 2920 equipped with a thermal conductivity detector (TCD). Prior to the experiments, the samples were treated in argon (50 ml/min) in the TPR mode up to 50°C, followed by dwelling at 50°C for 5 minutes. The  $H_2$ -TPR measurement were carried out from room temperature to 750°C using a mixture of 10 %  $H_2/Ar$  in a heating rate of 10°C/min.

## **Catalytic tests**

Catalytic oxidative dehydrogenation reactions were performed in a fixed-bed tubular reactor with an 8 mm inner diameter under standard atmospheric pressure. A 0.5 g sample of MAX phase  $V_2AlC$  was mixed with 1 g of  $\alpha$ -alumina particles, homogenized, and packed into a quartz tube reactor, with quartz cotton positioned above the catalyst. The feed gases air, propane at 99.9% purity, and nitrogen at 99.999% purity were regulated via three independent mass flow controllers (ALICAT), ensuring flow rates of 2.0 ml/min for propane, 2.5 ml/min for air, and 25.5 ml/min for nitrogen. This setup achieved an  $O_2/C_3H_8$  molar ratio of 0.25, unless specified otherwise. Reactions were conducted at temperatures ranging from 450 °C to 650 °C and a gas hourly space velocity (GHSV) of 3600  $h^{-1}$ . To localize the maximum temperature, a stainless-steel tube with a 2 mm outer diameter, closed at one end and equipped with a movable thermocouple, was positioned at the centre of the catalyst bed. The reaction commenced with

heating the catalyst to 450 °C under a nitrogen (N<sub>2</sub>) atmosphere, followed by the introduction of propane and air. During standard reaction conditions, the temperature was incrementally raised to 650 °C, with a one-hour hold at each increment. Reaction products, namely methane, ethane, ethylene, propylene, and C<sub>4</sub> hydrocarbons, were detected using a Flame Ionization Detector (FID), while nitrogen, carbon monoxide, oxygen, and carbon dioxide were measured using a Thermal Conductivity Detector (TCD). The conversion of propane, denoted as X(C<sub>3</sub>H<sub>8</sub>), and the selectivity of propylene, denoted as S(C<sub>3</sub>H<sub>6</sub>), were calculated according to prescribed formulas.

$$X(C_3H_8) = \frac{N_{C_3H_8\ in} - N_{C_3H_8\ out}}{N_{C_3H_8\ in}}$$

$$S(C_3H_6) = \frac{N_{C_3H_6\ out}}{N_{C_3H_8\ in} - N_{C_3H_8\ out}}$$

In this calculation formula, N<sub>C<sub>3</sub>H<sub>8</sub></sub> in and N<sub>C<sub>3</sub>H<sub>8</sub></sub> out denote the molar flow rates of propane entering and exiting the reactor, respectively. Moreover, N<sub>C<sub>3</sub>H<sub>6</sub></sub> out represents the molar flow rate of propylene at the reactor's outlet.

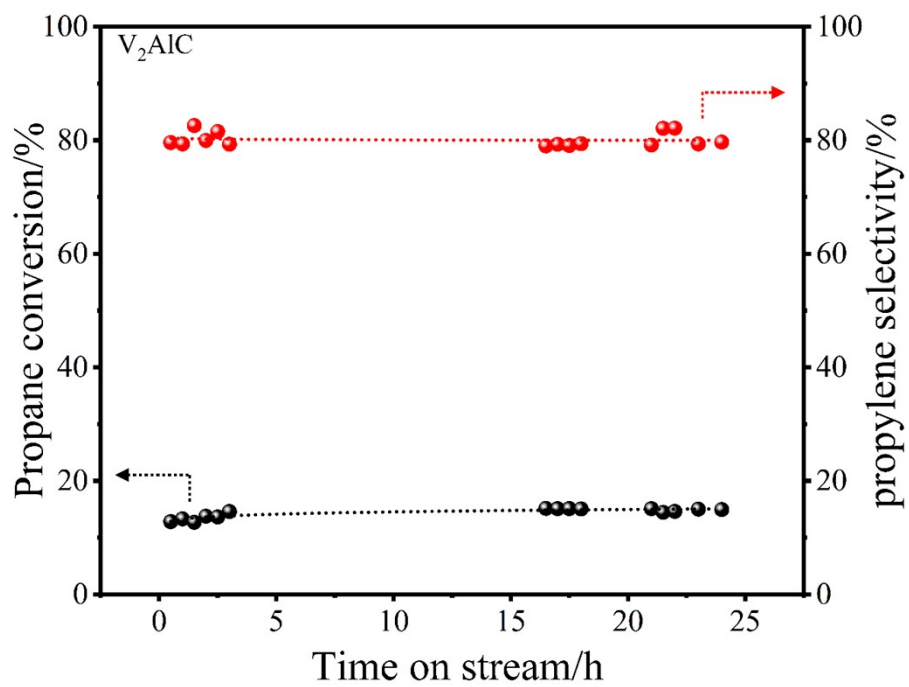

**Fig. S1** V<sub>2</sub>AlC duration test at 550 °C for 24 hours

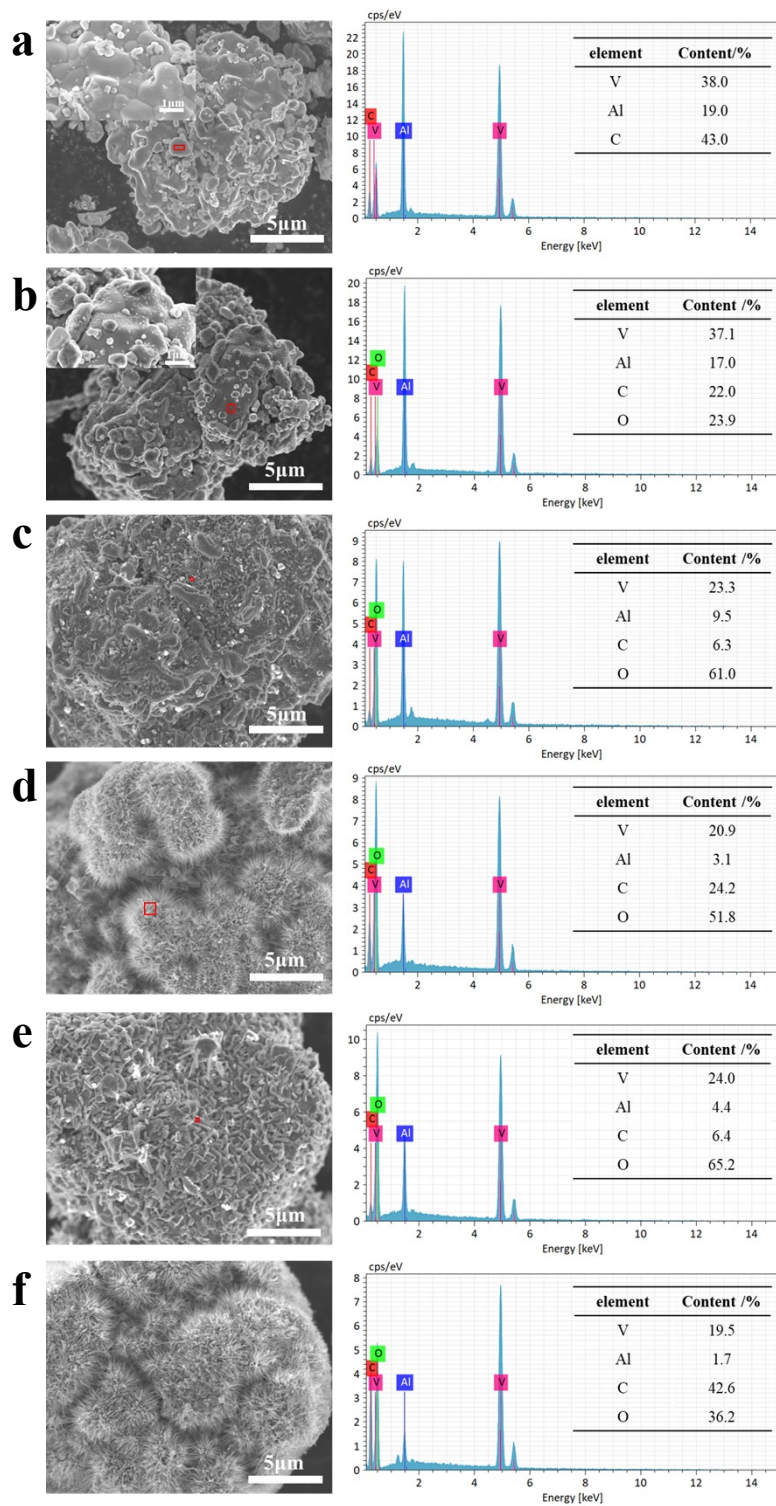

**Fig. S2** EDS of (a, b) fresh and used  $V_2AlC$ , (c, d) fresh and used  $V_2AlC$  after 3h preheating, and (e, f) fresh and used  $V_2AlC$  after 12h preheating, respectively. All samples used in one reaction cycle.

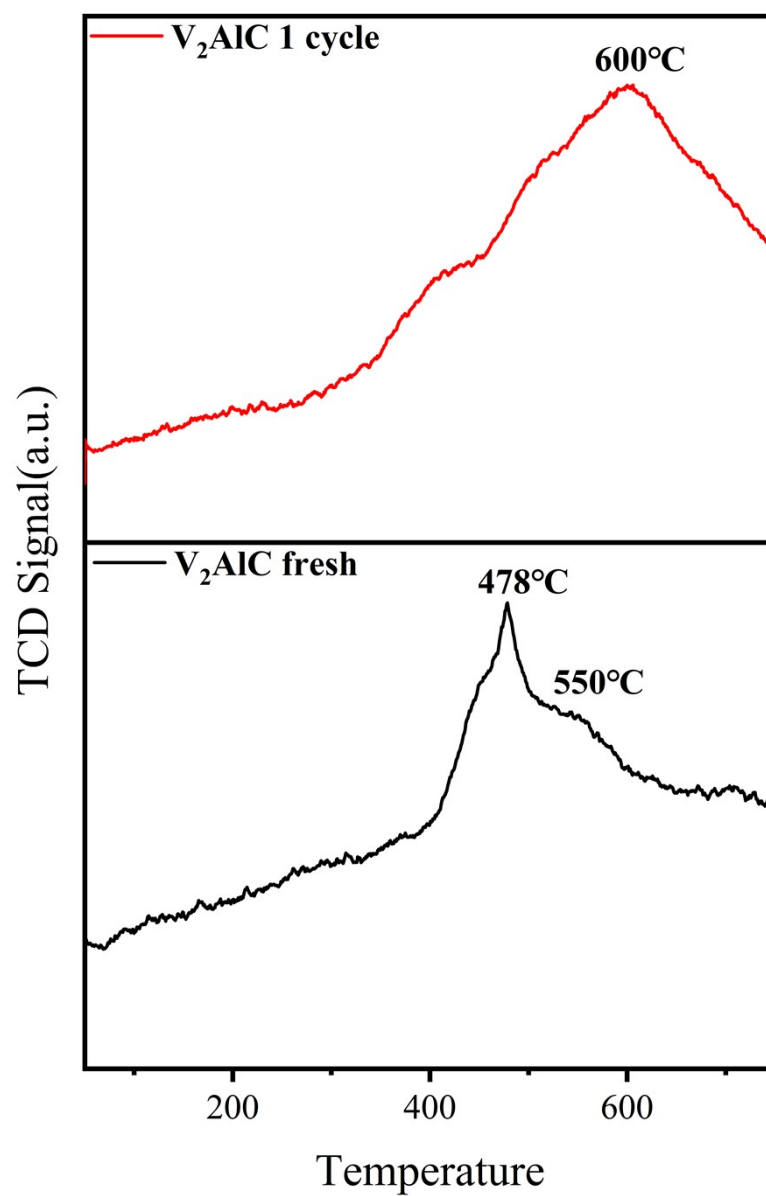

**Fig. S3** H<sub>2</sub>-TPR profiles of fresh V<sub>2</sub>AlC and V<sub>2</sub>AlC used in one reaction cycle

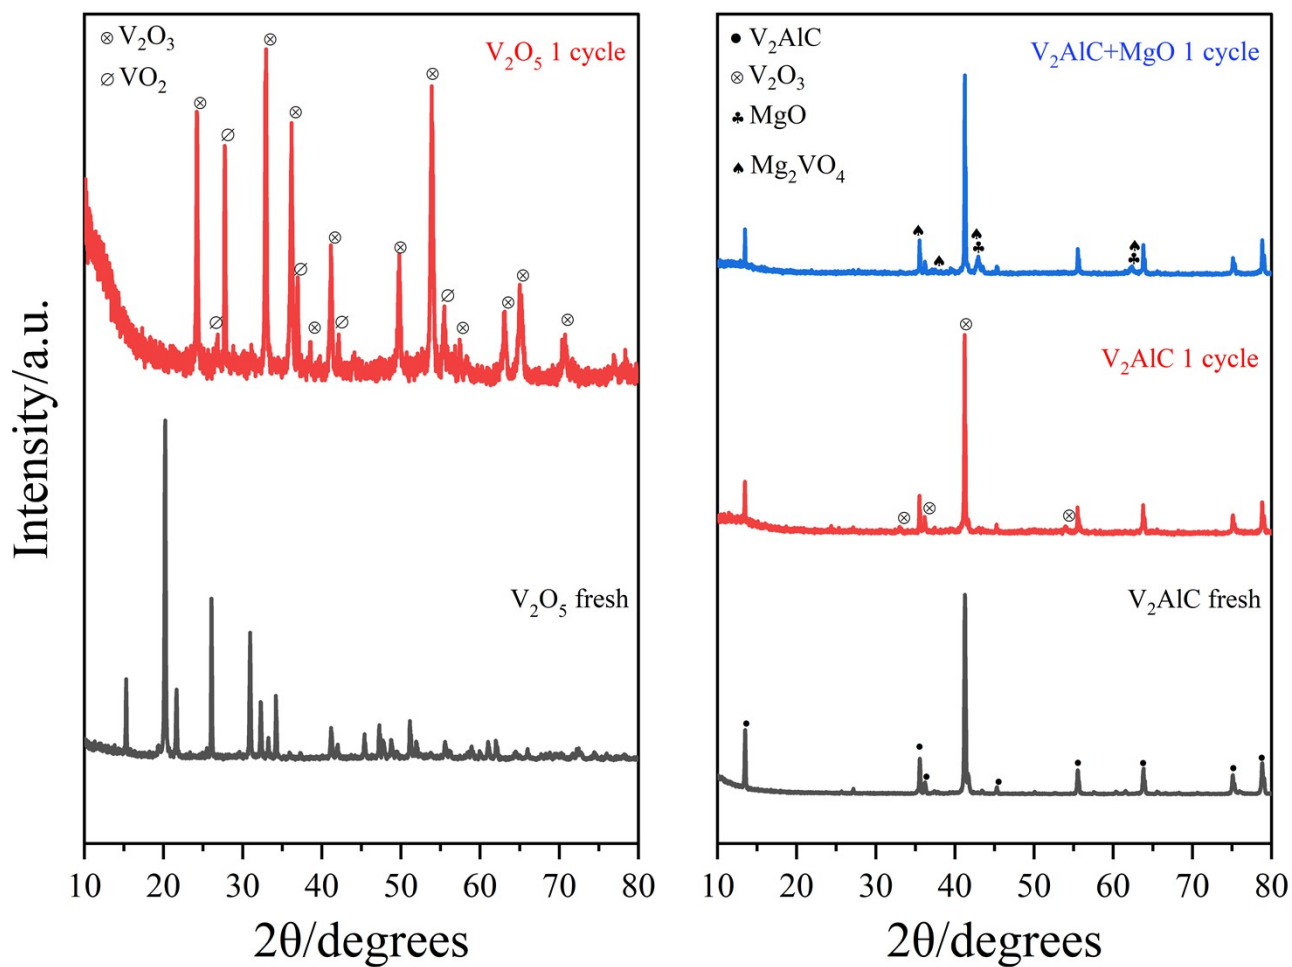

**Fig. S4** XRD patterns of various sample including  $V_2O_5$ , both fresh and used in one cycle of reaction,  $V_2AlC$ , fresh and used in one cycle of reaction, and MgO doped one used in one cycle of reaction.

**Table S1** The composition of various V<sub>2</sub>AlC including fresh, used sample in one cycle of reaction, MgO doped sample used in one cycle of reaction, pre-heated V<sub>2</sub>AlC for 3 hours and 12 hours, used in one cycle of reaction.

| Catalyst sample                                 | V <sub>2</sub> AlC % | VO <sub>x</sub> % | Al <sub>2</sub> O <sub>3</sub> % |
|-------------------------------------------------|----------------------|-------------------|----------------------------------|
| fresh V <sub>2</sub> AlC                        | 98.5%                | 0.0%              | 1.5%                             |
| V <sub>2</sub> AlC, as used                     | 90.07%               | 8.16%             | 1.77%                            |
| V <sub>2</sub> AlC MgO doping, as used          | 96.7%                | 0.0%              | 3.3%                             |
| V <sub>2</sub> AlC 3hr pretreated, as used      | 39.4%                | 54.2%             | 6.4%                             |
| V <sub>2</sub> AlC 12hr pretreated, as use      | 27.5%                | 66.4%             | 6.1%                             |
| V <sub>2</sub> AlC, as used (24h duration test) | 90.89%               | 4.00%             | 5.11%                            |
| V <sub>2</sub> AlC, as used (72h duration test) | 81.15%               | 16.41%            | 2.44%                            |



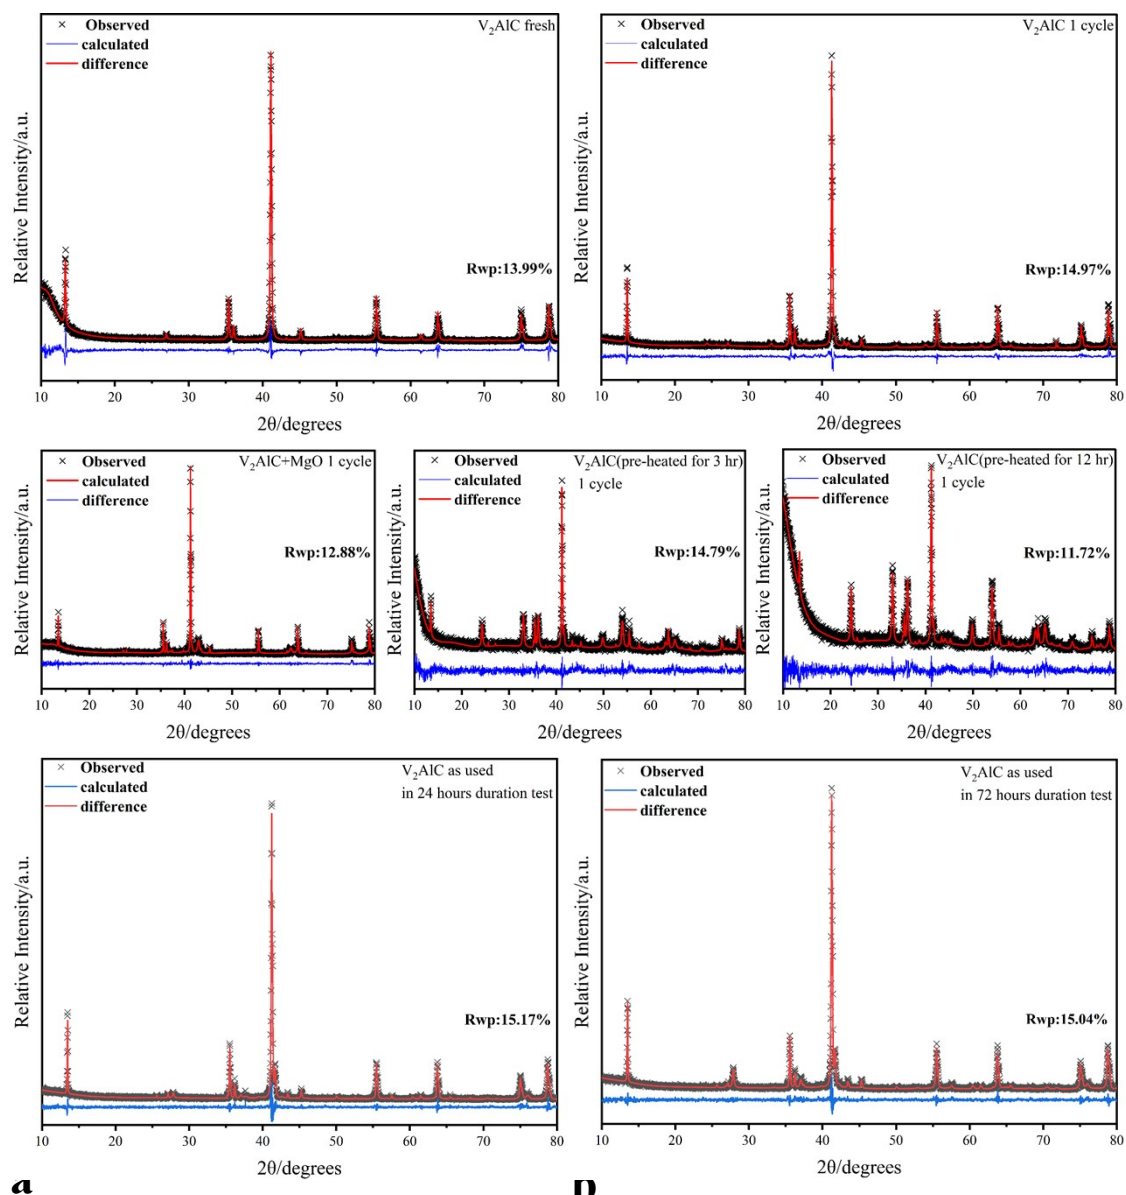

**a**

**d**

**Fig. S5** XRD patterns of various  $V_2AlC$  including a) fresh, b) used sample in one cycle of reaction, c) MgO doped sample used in one cycle of reaction, d), e) pre-heated  $V_2AlC$  for 3 hours and 12 hours, used in one cycle of reaction, f), g) used in duration test for 24 and 72 hours.

**c**

**d**

**e**

**f**

**g**

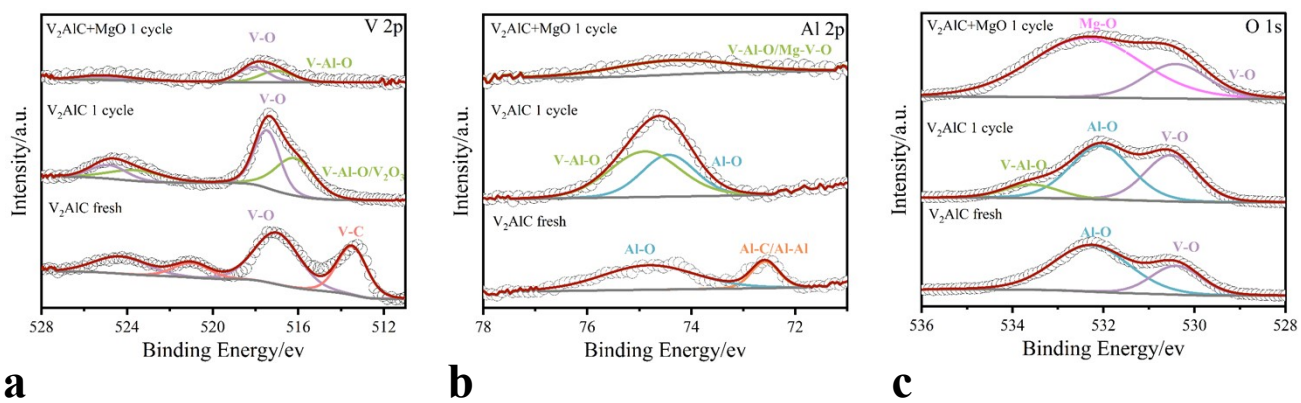

**Fig. S6** XPS spectra of (a) V2p, (b) Al2p, (c) O 1s of samples including fresh  $V_2AlC$ , used  $V_2AlC$  in one cycle of reaction, and MgO doped  $V_2AlC$  used in one cycle of reaction.
